# Supplementary material for: Angle-gated Na⁺ binding and release in the VO motor revealed by all-atom simulations
Source: Research Square preprint supplement (doi:10.21203/rs.3.rs-8101354/v1), 2025-12-05
Supplement: Supplementary file 1 [file d203080fa8fbcd5fc99272eb.docx]

**Supplementary Information for**

**Angle-gated Na⁺ binding and release in the VO motor revealed by all-atom simulations**

Satoshi Yasuda1,2,†,*, Masao Inoue3,†, Kano Suzuki1,2,4, Mitsunori Ikeguchi3,5, Takeshi Murata1,2,*

**Affiliations**

1Graduate School of Science, Chiba University, 1-33 Yayoi-cho, Inage, Chiba 263-8522, Japan

2Center of Quantum Life Science for Structural Therapeutics (cQUEST), Chiba University, 1-33 Yayoi-cho, Inage, Chiba 263-8522, Japan

3Graduate School of Medical Life Science, Yokohama City University, Yokohama 230-0045, Japan

4Institute for Quantum Life Science, National Institutes for Quantum Science and Technology (QST), Anagawa 4-9-1, Inage-ku, Chiba

5HPC- and AI-driven Drug Development Platform Division, Center for Computational Science, RIKEN, Yokohama 230-0045, Japan

†These authors contributed equally to this work.

*Corresponding authors. Email: s.yasud@chiba-u.jp

t.murata@faculty.chiba-u.jp

**Supplementary Table 1:Summary of 50 molecular dynamics (MD) simulation trials.**

The table lists the final rotation angle, total simulation time, and the occurrence of individual transport-related events (Events I–VI), indicated by “O” (observed) or “X” (not observed).

**Supplementary Video 1:**

Overall view of Na⁺ transport observed in Run 5. Both top and side views are presented.

Event I (disruption of electrostatic interactions) occurs at ~16 s;

Event II (Na⁺ binding) at ~44 s;

Event III (dehydration and membrane insertion of Na⁺) at ~1 min 6 s;

Event IV (contact between Bound Na⁺ and Water Molecules) occurs at ~19 s;

Event V (Na⁺ Dissociation) at ~40 s;

Event VI (Release to the Periplasmic Side) at ~1 min 16 s;

**Supplementary Video 2:**

MD trajectory illustrating Event I.

**Supplementary Video 3:**

MD trajectory illustrating Events II and III.

**Supplementary Video 4:**

MD trajectory illustrating Events IV and V.

**Supplementary Movie 5:**

MD trajectory illustrating Event VI.
